# Supplementary material for: Efficacy of coupled plasma filtration adsorption (CPFA) in patients with septic shock: A multicenter randomised controlled clinical trial
Source: HighWire-hosted journal article supplement (doi:10.1136/bmjopen-2013-003536), 2014-01-01
Supplement: bmjopen-2013-003536supp_appendix.pdf [file bmjopen-2013-003536supp_appendix.pdf]

## Appendix

### **List of co-authors** (in alphabetic order, with their location in brackets):

Armando Alborghetti (Ponte San Pietro-BG); Bruno Balicco (Zingonia-BG); Franco Bonello (Ivrea-TO); Francesco Casino (Matera-MT); Giacomo Castiglione (Catania-CT); Marco Cavana (Aosta-AO); Paolo Conti (Firenze-FI); Tiziana D'Amato (Imperia-IM); Carlo Donadio (Pisa-PI); Emilio Fabbri (Forlì-FC); Fiorenza Ferrari (Torino-TO); Bertilla Fiorese (Brescia-BS); Mario Gaggiotti (Brescia-BS); Marco Lorenz (Zingonia-BG); Mariella Maio (Torino-TO); Massimo Manes (Aosta-AO); Marco Manganaro (Alessandria-AL); Valerio Mangani (Firenze-FI); Antonio Mannarino (Firenze-FI); Gianmario Marchesi (Bergamo-BG); Paolo Martinelli (Firenze-FI); Agnese Meterangelis (Ponte San Pietro-BG); Giulio Mingardi (Bergamo-BG); Giuseppe Nardi (Roma-RM); Antonella Peralta (Sanremo-IM); Marco Pozzato (Torino-TO); Marco Riggio (Lecco-LC); Francesco Massimo Romito (Matera-MT); Rosa Salcuni (Ivrea-TO); Silvano Scaioli (Forlì-FC); Silvia Scarrone (Alessandria-AL); Mario Tavola (Lecco-LC); Marina Terzitta (Forlì-FC); Ernesto Turello (Alessandria-AL); Bruno Viaggi (Pisa-PI); Loretta Zambianchi (Forlì-FC).

### **Scientific committee members** (in alphabetic order, with their location in brackets):

Guido Bertolini (Ranica, BG); Marco Formica (Cuneo); Sergio Livigni (Torino); Mariella Maio (Torino); Marco Pozzato (Torino); Giuseppe Remuzzi (Bergamo); Arrigo Schieppati (Bergamo).

### **Data and safety monitoring committee** (in alphabetic order; with their location in brackets):

Frank Brunkhorst (Jena, Germany); Martin Langer (Milano); Luigi Minetti (Milano); Mervyn Singer (London, UK).

### **GiViTI steering committee members** (in alphabetic order; with their location in brackets):

Guido Bertolini (Ranica; BG); Daniela Boccalatte (Lucca); Arturo Chierogato (Cesena); Daniela Codazzi (Bari); Roberto Fumagalli (Monza); Giorgio Gambale (Forlì); Martin Langer (Milano); Sergio Livigni (Torino); Paolo Malacarne (Pisa); Giuseppe Nardi (Roma); Daniele Poole (Belluno); Danilo Radrizzani (Legnano; MI); Mario Tavola (Lecco).
